# Supplementary material for: Synthesis, antioxidant and cytoprotective activity evaluation of C-3 substituted indole derivatives
Source: PubMed Central journal article supplement (PMC8322387; doi:10.1038/s41598-021-94904-z), 2021-07-29
Supplement: 41598_2021_94904_MOESM1_ESM.pdf [file 41598_2021_94904_MOESM1_ESM.pdf]

## Supplementary data

### Synthesis, antioxidant and cytoprotective activity evaluation of C-3 substituted indole derivatives

Beata Jasiewicz<sup>a\*</sup>, Weronika Kozanecka-Okupnik<sup>a</sup>, Michał Przygodzki<sup>b</sup>, Beata Warżajtis<sup>a</sup>, Urszula Rychlewska<sup>a</sup>, Tomasz Pospieszny<sup>a</sup>, Lucyna Mrówczyńska<sup>b\*</sup>

<sup>a</sup>*Faculty of Chemistry, Adam Mickiewicz University, Uniwersytetu Poznańskiego 8, 61-614 Poznań, Poland*

<sup>b</sup>*Department of Cell Biology, Faculty of Biology, Adam Mickiewicz University, Uniwersytetu Poznańskiego 6, 61-614 Poznań, Poland*

#### TABLE OF CONTENTS

|                                                                                                                              |     |
|------------------------------------------------------------------------------------------------------------------------------|-----|
| Spectroscopic study of indole derivatives.....                                                                               | S2  |
| <sup>1</sup> H and <sup>13</sup> C NMR spectra of <i>N</i> -acetyl-indole-3-carbinol <b>3</b> .....                          | S5  |
| <sup>1</sup> H and <sup>13</sup> C NMR spectra of 3-Propoxy I3C <b>6</b> .....                                               | S6  |
| <sup>1</sup> H and <sup>13</sup> C NMR spectra of 3-Isopropoxy I3C <b>7</b> .....                                            | S7  |
| <sup>1</sup> H and <sup>13</sup> C NMR spectra of ( <i>1H</i> -indol-2-yl)methylpyrrolidine-1-carbodithioate <b>12</b> ..... | S8  |
| Table S1 Crystal data and data collection, and refinement details.....                                                       | S9  |
| Figure S8. Molecular models of gramine <b>1</b> , and its derivatives <b>3-13</b> calculated by the PM5 method.....          | S10 |
| Table S2. Heat of formation (HOF) of gramine <b>1</b> , and its derivatives <b>11-15</b> .....                               | S12 |

---

\* Corresponding author. Tel.: +48-61-8291354; fax.: +48-61-8291505. E-mail: [beatakoz@amu.edu.pl](mailto:beatakoz@amu.edu.pl) (Beata Jasiewicz), [lumro@amu.edu.pl](mailto:lumro@amu.edu.pl) (Lucyna Mrówczyńska)

*N,O-diacetyl-indole-3-carbinol (2)*

Solid, (162.5 mg, 70%); mp 89-90 °C (lit.<sup>1</sup> 88-90 °C); <sup>1</sup>H NMR (300 MHz, CDCl<sub>3</sub>): δ 8.45-8.42 (d, *J* = 8 Hz, 1H), 7.60-7.30 (m, 4H, indole ring), 5.27 (s, 2H, -CH<sub>2</sub>O-), 2.63 (s, 3H, CH<sub>3</sub>CO-), 2.09 (s, 3H, CH<sub>3</sub>COO-); <sup>13</sup>C NMR (75 MHz, CDCl<sub>3</sub>): δ 171.0, 168.5, 135.9, 129.2, 125.6, 124.9, 123.8, 119.0, 117.3, 116.7, 57.8, 23.9, 21.0; IR (KBr): 3115, 1732, 1705, 1607, 1457, 1342, 1331, 1249 cm<sup>-1</sup>; EI-MS (*m/z*, % int.): 231 (M<sup>+</sup>, 100). Elem. Anal. (calcd., found for C<sub>13</sub>H<sub>14</sub>NO<sub>3</sub>): C (67.23, 67.85), H (6.08, 6.17), N (6.03, 6.01).

*N-acetyl-indole-3-carbinol (3)*

Solid, (37.8 mg, 40%); m.p. 127-129 °C; <sup>1</sup>H NMR (300 MHz, CDCl<sub>3</sub>): δ = 7.64-7.25 (m, 4H, indole ring), 4.87 (s, 2H, -CH<sub>2</sub>OH), 2.60 (s, 3H, CH<sub>3</sub>CO-); <sup>13</sup>C NMR (75 MHz, CDCl<sub>3</sub>): δ 168.0, 136.2, 129.1, 125.6, 123.7, 122.8, 119.1, 116.7, 111.8, 57.3, 23.9; FT-IR (KBr): 3500-3000, 1687, 1606, 1451 cm<sup>-1</sup>; EI MS (*m/z*, % int.): 189 (M<sup>+</sup>, 75). Elem. Anal. (calcd., found for C<sub>11</sub>H<sub>11</sub>NO<sub>2</sub>): C (69.83, 69.93), H (5.85, 5.72), N (7.40, 7.31).

*3-Methoxy-indole-3-carbinol (4)*

Solid, (101 mg, 63%); m.p. 95-96 °C (lit.<sup>1</sup> 93-94 °C); <sup>1</sup>H NMR (300 MHz, DMSO-*d*<sub>6</sub>): δ = 10.40 (s, 1H, NH), 7.72-6.73 (m, 5H, indole ring), 4.62 (s, 2H, -O-CH<sub>2</sub>-), 3.29-3.25 (m, 3H, -O-CH<sub>3</sub>); <sup>13</sup>C NMR (75 MHz, DMSO-*d*<sub>6</sub>): δ 136.3, 127.1, 124.7, 123.8, 121.7, 121.2, 118.8, 111.5, 63.9, 57.3. EI MS (*m/z*, % int.): 161 (M<sup>+</sup>, 78). Elem. Anal. (calcd., found for C<sub>10</sub>H<sub>11</sub>NO): C (74.51, 74.47), H (6.88, 6.57), N (8.69, 8.43).

*3-Ethoxy-indole-3-carbinol (5)*

Solid, (123 mg, 70%); m.p. 64-66 °C (lit.<sup>1</sup> 63-65 °C); <sup>1</sup>H NMR (300 MHz, DMSO-*d*<sub>6</sub>): δ = 9.93 (s, 1H, NH), 7.58-6.97 (5H, indole ring), 4.72 (s, 2H, indole ring-CH<sub>2</sub>O-), 3.58 (m, 2H, -O-CH<sub>2</sub>-), 1.24 (t, 3H, -CH<sub>3</sub>). <sup>13</sup>C NMR (75 MHz, DMSO-*d*<sub>6</sub>): δ = 136.3, 127.0, 124.6, 123.3, 121.9, 121.1, 118.7, 111.4, 63.9, 63.8, 15.2. EI-MS (*m/z*, % int.): 175 (M<sup>+</sup>, 63). Elem. Anal. (calcd., found for C<sub>11</sub>H<sub>14</sub>NO): C (74.97, 74.85), H (8.01, 8.17), N (7.95, 7.83).

*3-Propoxy-indole-3-carbinol (6)*

Brown oil, (151 mg, 80%); <sup>1</sup>H NMR (300 MHz, CDCl<sub>3</sub>): δ = 8.11 (bs, 1H, NH), 7.72-7.10 (m, 5H, indole ring), 4.72 (s, 2H, -CH<sub>2</sub>-O), 3.48 (t, *J* = 6.8 Hz, 2H), 1.69-1.58 (m, 2H, -CH<sub>2</sub>-), 0.95-0.90 (t, *J* = 7.4 Hz, 3H); <sup>13</sup>C NMR (75 MHz, CDCl<sub>3</sub>): δ = 136.4, 127.2, 123.4, 122.2, 119.7, 119.3, 113.7, 111.1, 71.6, 64.9, 23.0, 10.7; EI MS (*m/z*, % int.): 189 (M<sup>+</sup>, 40). Elem. Anal. (calcd., found for C<sub>12</sub>H<sub>15</sub>NO): C (76.16, 76.07), H (7.99, 7.82), N (7.40, 7.25).

*3-Isopropoxy-indole3-carbinol (7)*

Brown oil, (142 mg, 75%); <sup>1</sup>H NMR (300 MHz, CDCl<sub>3</sub>): δ = 8.07 (bs, 1H, NH), 7.71-7.10 (m, 5H, indole ring), 4.72 (s, 2H, -CH<sub>2</sub>-O), 3.77 (q, *J* = 6.1, 1H), 1.23 (d, *J* = 6.1 Hz, 6H); <sup>13</sup>C NMR (75 MHz, CDCl<sub>3</sub>): δ = 136.4, 127.1, 123.2, 122.1, 119.7, 119.3, 113.9, 111.0, 70.2, 62.1, 22.2; EI MS (*m/z*, % int.): 189 (M<sup>+</sup>, 30). Elem. Anal. (calcd., found for C<sub>12</sub>H<sub>15</sub>NO): C (76.16, 76.24), H (7.99, 8.06), N (7.40, 7.51).

*3-Butoxy-indole-3-carbinol (8)*

Brown oil, (112 mg, 55%); <sup>1</sup>H NMR (300 MHz, CDCl<sub>3</sub>): δ = 8.10 (s, 1H, NH), 7.74-7.11 (m, 5H, indole ring), 4.71 (s, 2H, -CH<sub>2</sub>-O), 3.60-3.52 (m, 2H, -O-CH<sub>2</sub>-), 1.70-0.90 (m, 7H); <sup>13</sup>C NMR (75 MHz, CDCl<sub>3</sub>): δ = 136.4, 127.2, 123.3, 122.1, 119.7, 119.3, 113.8, 111.1, 71.3, 65.9, 22.9, 21.5, 13.7; EI MS (*m/z*, % int.): 203 (M<sup>+</sup>, 10). Elem. Anal. (calcd., found for C<sub>13</sub>H<sub>17</sub>NO): C (76.81, 76.92), H (8.43, 8.39), N (6.89, 6.94).

*3-Pentoxy-indole3-carbinol (9)*

Brown oil, (76 mg, 35%); <sup>1</sup>H NMR (300 MHz, CDCl<sub>3</sub>): δ = 8.10-7.05 (m, 6H, NH, indole ring), 5.37 (s, 2H, -CH<sub>2</sub>-O), 3.45-3.43 (m, 2H, -O-CH<sub>2</sub>-), 1.70-1.23 (m, 6H), 0.92-0.88 (m, 3H, -CH<sub>3</sub>); <sup>13</sup>C NMR (75 MHz, CDCl<sub>3</sub>): δ = 136.7, 127.4, 123.2, 122.3, 119.5, 119.1, 113.8, 111.2, 71.5, 65.7, 22.7, 20.5, 12.7, 10.5; EI MS (*m/z*, % int.): 217 (M<sup>+</sup>, 15). Elem. Anal. (calcd., found for C<sub>14</sub>H<sub>19</sub>NO): C (77.38, 77.15), H (8.81, 8.73), N (6.45, 6.32).

*3-Isopentoxy-indole3-carbinol (10)*

Brown oil, (137 mg, 63%); <sup>1</sup>H NMR (300 MHz, CDCl<sub>3</sub>): δ = 8.05-7.00 (m, 6H, NH, indole ring), 5.36 (s, 2H, -CH<sub>2</sub>-O), 3.48-3.45 (m, 2H, -O-CH<sub>2</sub>-), 1.74-1.43 (m, 3H), 0.86-0.84 (m, 6H, -CH<sub>3</sub>); <sup>13</sup>C NMR (75 MHz, CDCl<sub>3</sub>): δ = 136.8, 127.4, 123.1, 122.4, 119.6, 119.1, 113.6, 111.2, 71.6, 65.5, 22.8, 21.5, 15.7, 15.2; EI MS (*m/z*, % int.): 217 (M<sup>+</sup>, 6). Elem. Anal. (calcd., found for C<sub>14</sub>H<sub>19</sub>NO): C (77.38, 77.45), H (8.81, 8.94), N (6.45, 6.52).

*3,3'-Diindolylmethane DIM (11)*

Solid, (25 mg, 20%); m.p. 166-168 °C (lit.<sup>2</sup> 167-169 °C); <sup>1</sup>H NMR (300 MHz, CDCl<sub>3</sub>): δ = 10.5 (bs, 2H), 7.00-8.05 (m, 12H, indole rings), 4.64 (s, 2H, -CH<sub>2</sub>-); <sup>13</sup>C NMR (101 MHz, CDCl<sub>3</sub>): δ = 137.2, 127.8, 122.8, 121.9, 119.6, 115.9, 110.3, 75.7, 21.2; EI MS (*m/z*, % int.): 246 (M<sup>+</sup>, 100).

*(1H-indol-2-yl)methylpyrrolidine-1-carbodithioate (12)*

Brown oil, (69 mg, 25%); <sup>1</sup>H NMR (403 MHz, CDCl<sub>3</sub>): δ = 8.33 (s, 1H, NH), 7.72-7.11 (m, 5H, indole ring), 4.77 (s, 2H, -CH<sub>2</sub>-S), 3.97-3.86 (m, 2H, N-CH<sub>2</sub>-), 3.56-3.53 (m, 2H, N-CH<sub>2</sub>-), 2.07-1.84 (m, 4H, -CH<sub>2</sub>-CH<sub>2</sub>); <sup>13</sup>C NMR (101 MHz, CDCl<sub>3</sub>): δ = 192.9, 136.1, 126.8, 124.0,

122.2, 119.6, 118.9, 111.3, 109.9, 54.7, 50.5, 32.8, 25.9, 24.2; FT-IR (KBr): 3405, 3054-2870, 1617, 1547, 1436, 1338, 1248, 1181  $\text{cm}^{-1}$ ; EI MS ( $m/z$ , % int.): 276 ( $\text{M}^+$ , 8); Elem. Anal. (calcd., found for  $\text{C}_{14}\text{H}_{16}\text{N}_2\text{S}_2$ ): C (60.83, 60.79), H (5.83, 5.74), N (10.13, 10.17), S (23.20, 23.18).

*3-Imidazol-1-ylmethyl-indole (13)*

Solid, (187 mg, 95%); m.p. 170-171  $^{\circ}\text{C}$  (lit.<sup>3</sup> 172-174  $^{\circ}\text{C}$ );  $^1\text{H}$  NMR (403 MHz,  $\text{CDCl}_3$ ):  $\delta$  = 12.13 (bs, 1H, NH), 7.72 (s, 1H, N-CH=N), 7.60-7.02 (m, 5H, indole ring), 7.12 (s, 2H, N-CH=CH-N), 5.31 (s, 2H,  $\text{CH}_2$ -N);  $^{13}\text{C}$  NMR (101 MHz,  $\text{CDCl}_3$ ):  $\delta$  = 136.7, 135.2, 128.5, 126.1, 124.2, 122.4, 121.8, 119.9, 119.4, 118.0, 42.8; FT-IR (KBr): 3124-2615, 1542, 1448, 1326, 1262  $\text{cm}^{-1}$ ; EI MS ( $m/z$ , % int.): 197 ( $\text{M}^+$ , 20); Elem. Anal. (calcd., found for  $\text{C}_{12}\text{H}_{11}\text{N}_3$ ): C (73.07, 73.14), H (5.62, 5.59), N (21.30, 21.27).

*N-Indol-3-ylmethyl-phthalimide (14)*

Solid, (218 mg, 79%); m.p. 180-182  $^{\circ}\text{C}$  (lit.<sup>4</sup> 181-183  $^{\circ}\text{C}$ );  $^1\text{H}$  NMR (403 MHz,  $\text{CDCl}_3$ ):  $\delta$  = 8.09 (bs, 1H, NH), 7.95 (s, 1H), 7.78 (d,  $J$  = 3.0, 2H), 7.64 (s, 2H), 7.39 (s, 1H), 7.33 (d,  $J$  = 7.0 Hz, 1H), 7.15 (s, 2H), 5.03 (s, 2H);  $^{13}\text{C}$  NMR (101 MHz,  $\text{CDCl}_3$ ):  $\delta$  = 168.2, 135.9, 133.8, 132.2, 126.4, 125.1, 123.1, 122.4, 120., 119.4, 111.4, 111.2, 32.6; FT-IR (KBr): 3389, 3108, 3069, 2943, 1764, 1696  $\text{cm}^{-1}$ ; EI MS ( $m/z$ , % int.): 276 ( $\text{M}^+$ , 75); Elem. Anal. (calcd., found for  $\text{C}_{17}\text{H}_{12}\text{N}_2\text{O}_2$ ): C (73.90, 73.76), H (4.38, 4.30), N (10.14, 10.19).

*N-(N'-acetylindol-3-yl)methyl-phthalimide (15)*

Solid, (92 mg, 80%); m.p. 196-198  $^{\circ}\text{C}$  (lit.<sup>5</sup> 200-200.5  $^{\circ}\text{C}$ );  $^1\text{H}$  NMR (403 MHz,  $\text{CDCl}_3$ ):  $\delta$  = 8.40 (s, 1H, NH), 7.86 (ddd,  $J$  = 7.3, 1.7, 0.8 Hz, 1H), 7.84-7.79 (m, 2H, ArH), 7.73-7.67 (m, 2H, ArH), 7.6 (s, 1H), 7.44-7.29 (m, 2H), 4.97 (s, 2H), 2.64 (s, 3H);  $^{13}\text{C}$  NMR (101 MHz,  $\text{CDCl}_3$ ):  $\delta$  = 168.6, 168.0, 135.7, 134.1, 132.0, 129.1, 125.7, 125.5, 123.9, 123.3, 119.4, 117.3, 116.6, 32.2, 24.0; FT-IR (KBr): 3459, 3125, 3051, 1768, 1712, 1610, 1453  $\text{cm}^{-1}$ ; EI MS ( $m/z$ , % int.): 318 ( $\text{M}^+$ , 25), 276 (25), 130 (50). Elem. Anal. (calcd., found for  $\text{C}_{19}\text{H}_{14}\text{N}_2\text{O}_3$ ): C (71.69, 71.60), H (4.43, 4.51), N (8.80, 8.76).

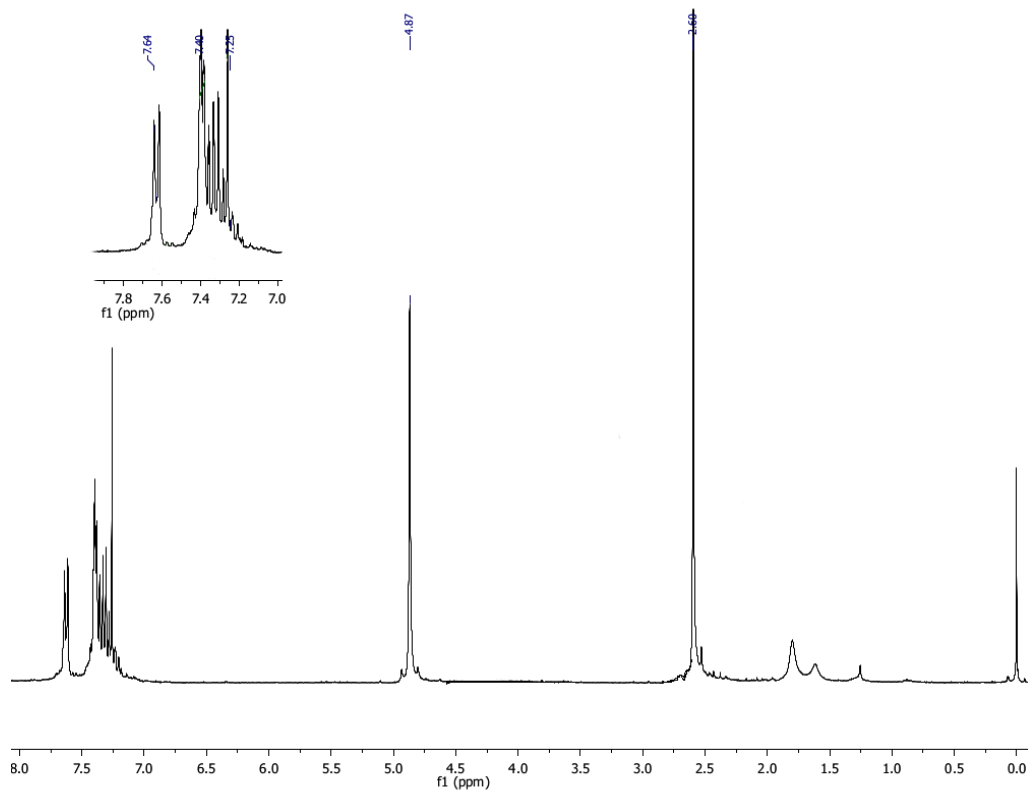

**Figure S1a.**  $^1\text{H}$  NMR spectrum of *N*-acetyl-indole-3-carbinol **3**.

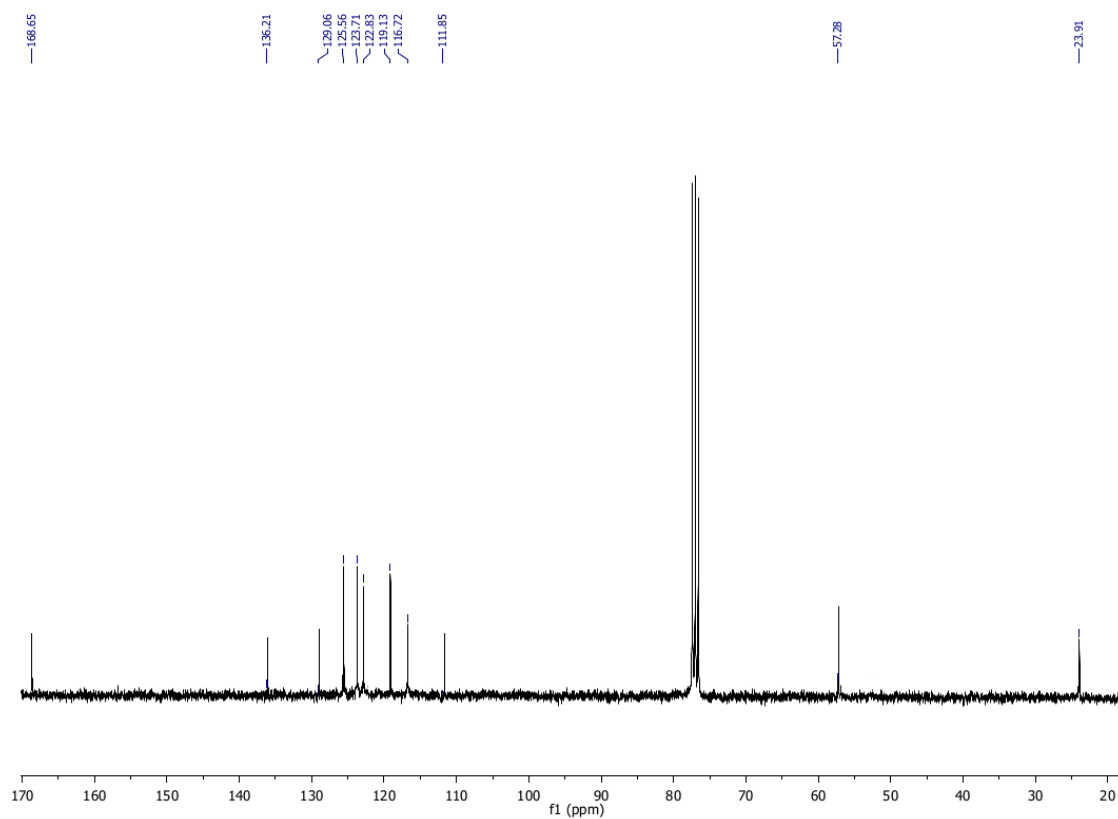

**Figure S1b.**  $^{13}\text{C}$  NMR spectrum of *N*-acetyl-indole-3-carbinol **3**.

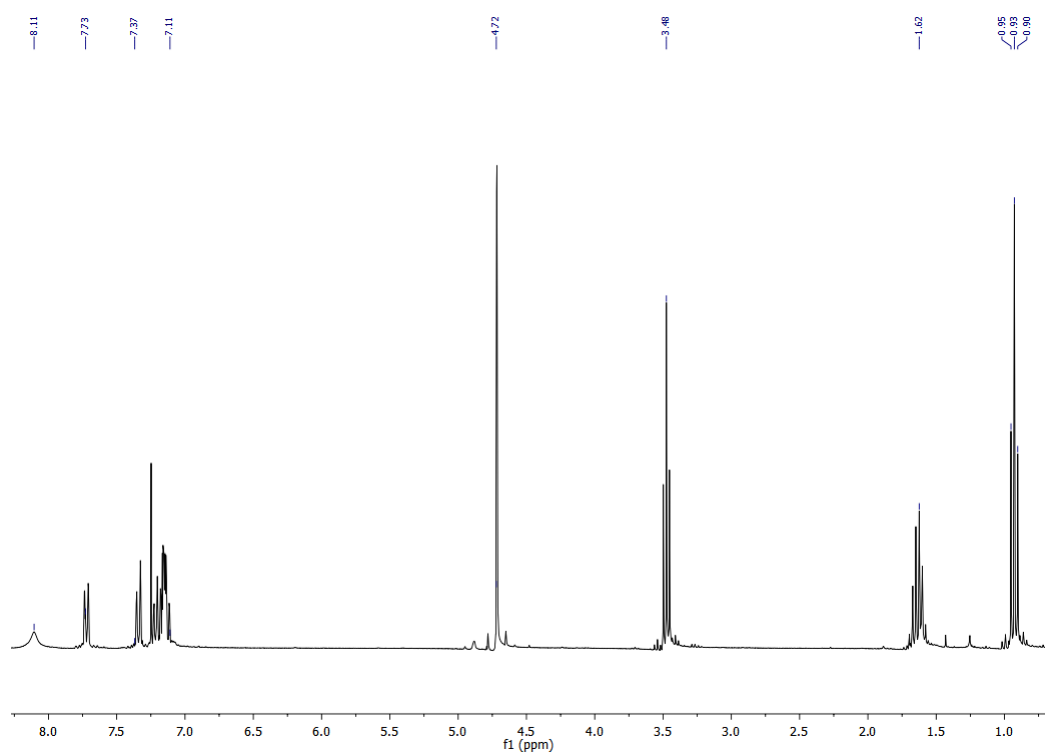

**Figure S2a.**  $^1\text{H}$  NMR spectrum of 3-Propoxy I3C **6**.

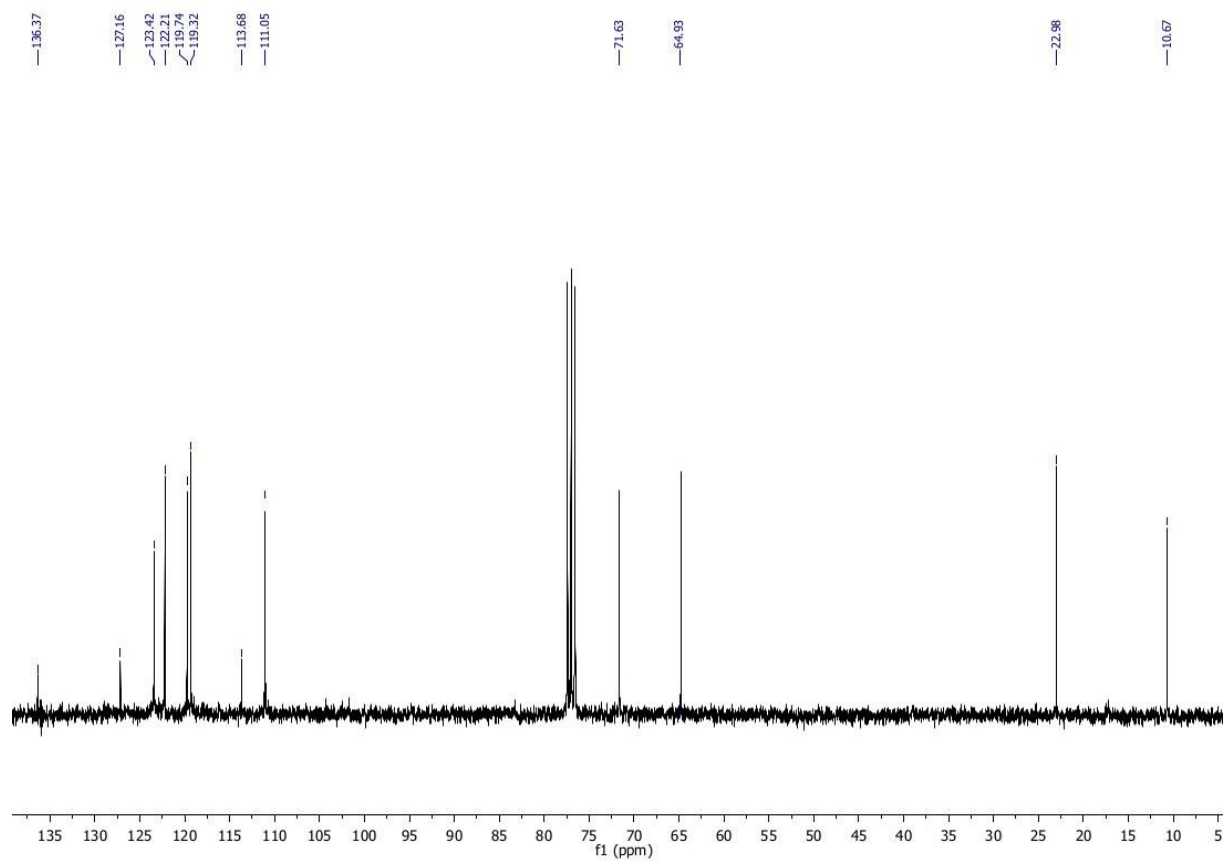

**Figure S2b.**  $^{13}\text{C}$  NMR spectrum of 3-Propoxy I3C **6**.

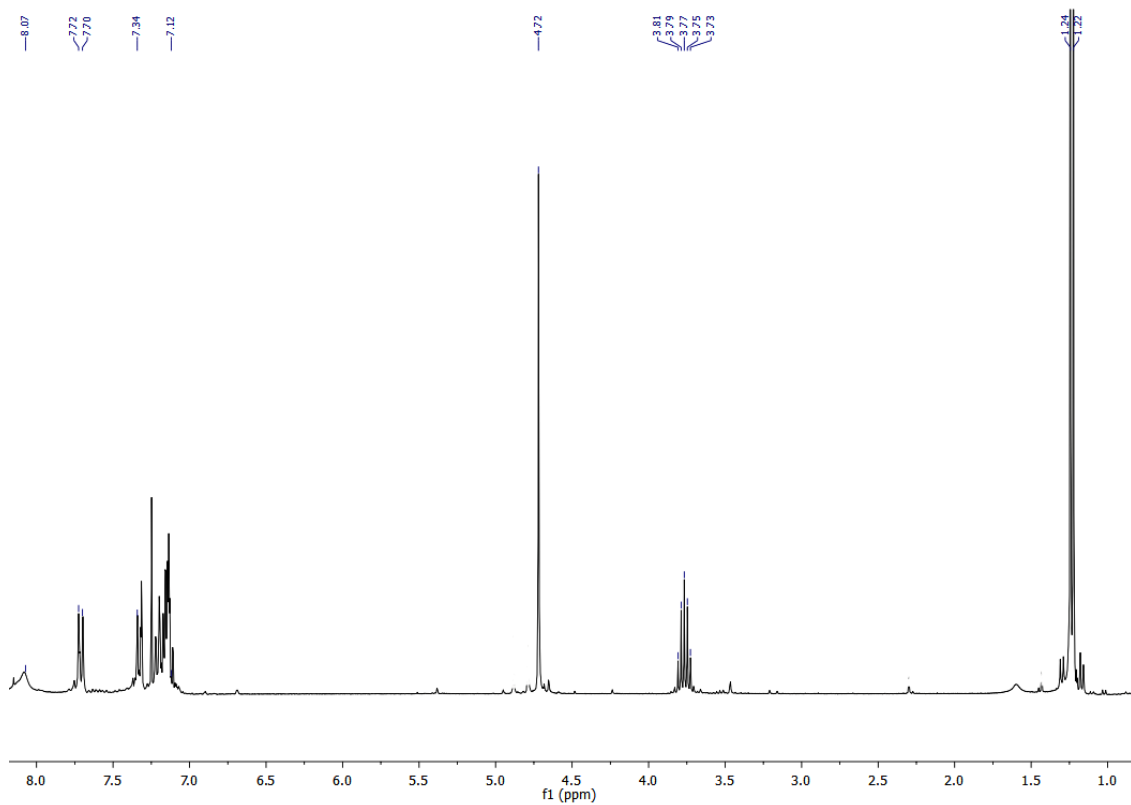

**Figure S3a.**  $^1\text{H}$  NMR spectrum of 3-Isopropoxy I3C 7.

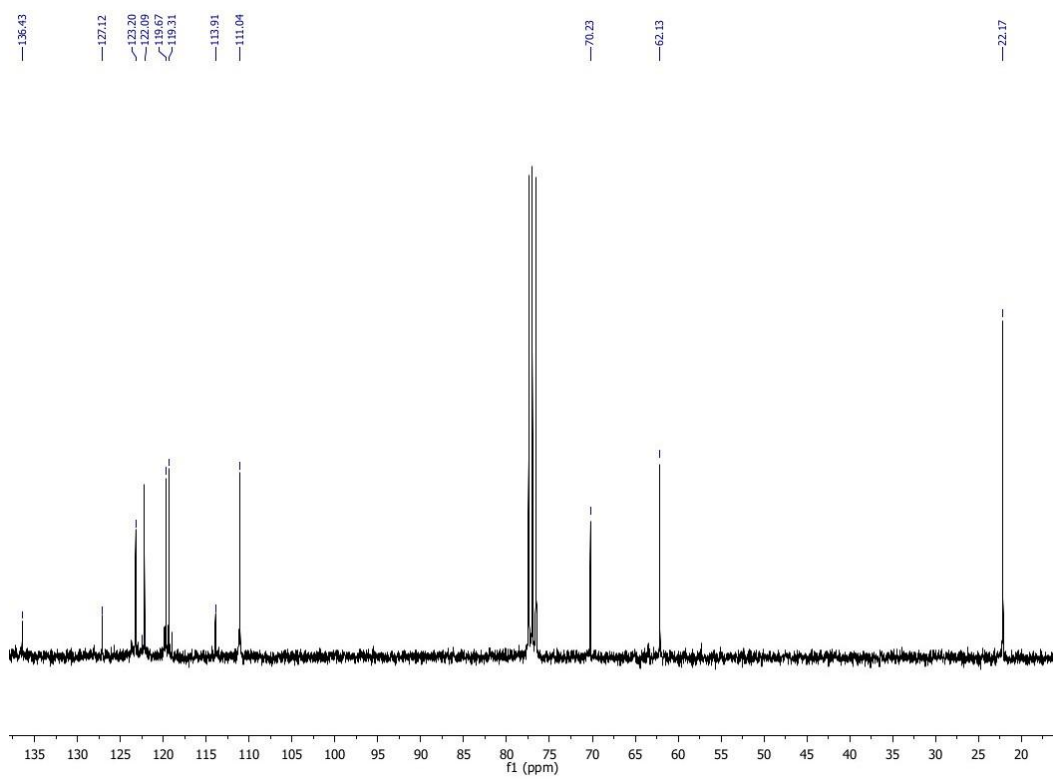

**Figure S3b.**  $^{13}\text{C}$  NMR spectrum of 3-Isopropoxy I3C 7.

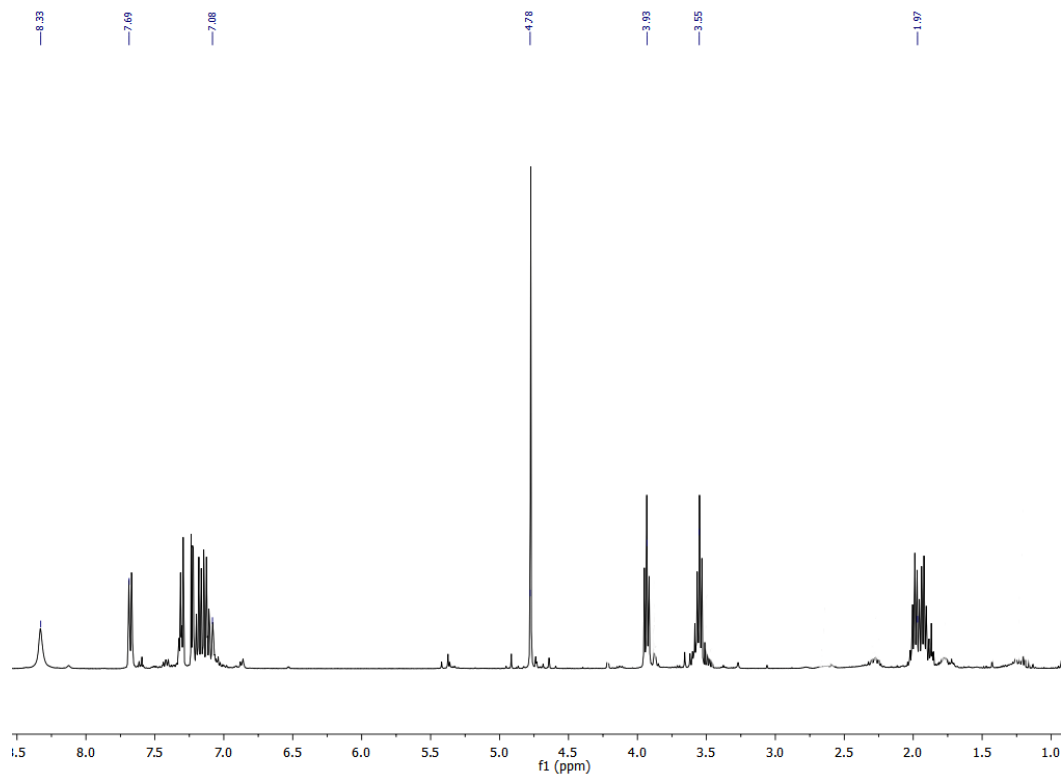

**Figure S4a.**  $^1\text{H}$  NMR spectrum of (*1H*-indol-2-yl)methylpyrrolidine-1-carbodithioate **12**.

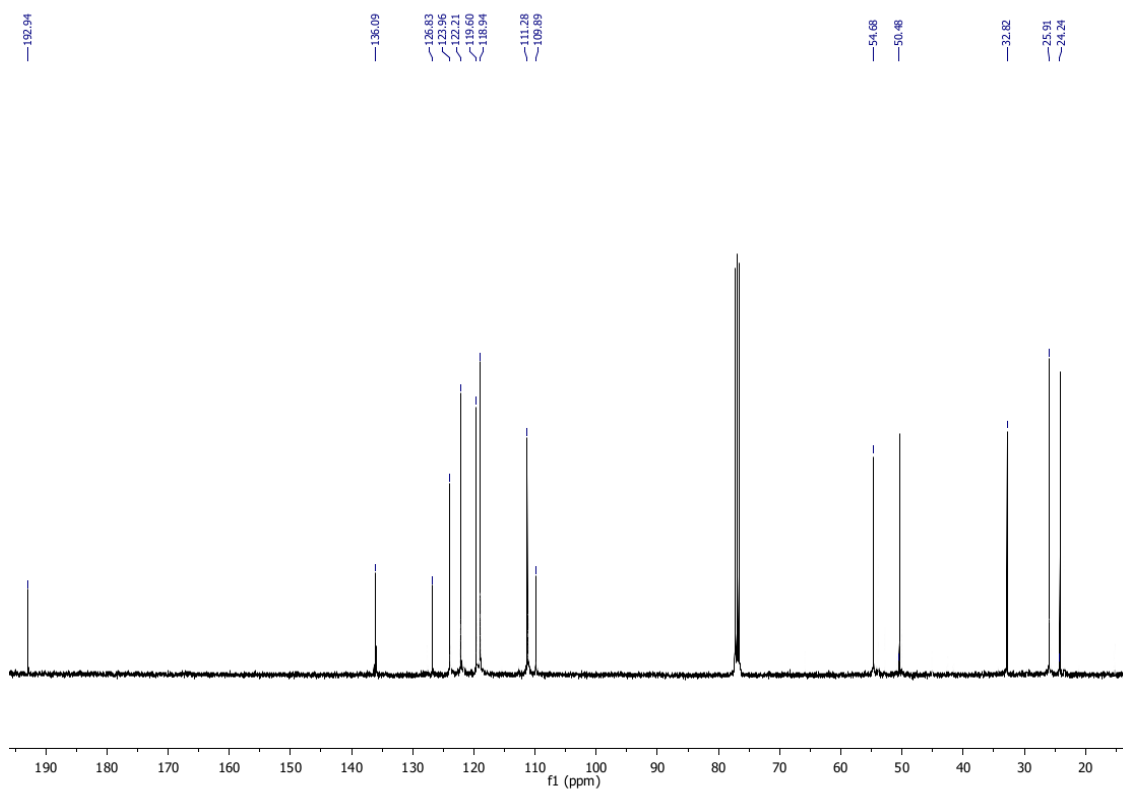

**Figure S4b.**  $^{13}\text{C}$  NMR spectrum of (*1H*-indol-2-yl)methylpyrrolidine-1-carbodithioate **12**.



**Table S1.** Crystal data and data collection, and refinement details

|                                                                                                                | (2)                                             | (14)                                                          | (15)                                                          |
|----------------------------------------------------------------------------------------------------------------|-------------------------------------------------|---------------------------------------------------------------|---------------------------------------------------------------|
| Crystal data                                                                                                   |                                                 |                                                               |                                                               |
| Chemical formula                                                                                               | C <sub>13</sub> H <sub>13</sub> NO <sub>3</sub> | C <sub>17</sub> H <sub>12</sub> N <sub>2</sub> O <sub>2</sub> | C <sub>19</sub> H <sub>14</sub> N <sub>2</sub> O <sub>3</sub> |
| <i>M<sub>r</sub></i>                                                                                           | 231.24                                          | 276.29                                                        | 318.32                                                        |
| Crystal system, space group                                                                                    | Monoclinic, <i>C2/c</i>                         | Orthorhombic, <i>Pna2<sub>1</sub></i>                         | Triclinic, <i>P</i> $\bar{1}$                                 |
| Temperature (K)                                                                                                | 295                                             |                                                               |                                                               |
| <i>a</i> , <i>b</i> , <i>c</i> (Å)                                                                             | 19.2159 (4), 7.4704 (2),<br>16.7645 (3)         | 6.9761 (1), 17.7481 (1),<br>10.9011 (1)                       | 4.7470 (2), 12.8370 (8),<br>13.4424 (7)                       |
| $\alpha$ , $\beta$ , $\gamma$ (°)                                                                              | 90, 100.070 (2), 90                             | 90, 90, 90                                                    | 69.868 (5), 81.294 (4),<br>81.284 (5)                         |
| <i>V</i> (Å <sup>3</sup> )                                                                                     | 2369.48 (9)                                     | 1349.69 (2)                                                   | 755.86 (7)                                                    |
| <i>Z</i>                                                                                                       | 8                                               | 4                                                             | 2                                                             |
| $\mu$ (mm <sup>-1</sup> )                                                                                      | 0.76                                            | 0.74                                                          | 0.79                                                          |
| Crystal size (mm)                                                                                              | 0.50 × 0.23 × 0.02                              | 0.45 × 0.30 × 0.10                                            | 0.55 × 0.05 × 0.02                                            |
| Data collection                                                                                                |                                                 |                                                               |                                                               |
| Diffractometer                                                                                                 | SuperNova, Single source at offset, Atlas       |                                                               |                                                               |
| <i>T<sub>min</sub></i> , <i>T<sub>max</sub></i>                                                                | 0.608, 1.000                                    | 0.714, 1.000                                                  | 0.852, 1.000                                                  |
| No. of measured,<br>independent and<br>observed [ <i>I</i> > 2σ( <i>I</i> )<br>reflections                     | 12989, 2084, 1922                               | 60142, 2385, 2370                                             | 7543, 2668, 2426                                              |
| <i>R<sub>int</sub></i>                                                                                         | 0.022                                           | 0.041                                                         | 0.017                                                         |
| (sin $\theta/\lambda$ ) <sub>max</sub> (Å <sup>-1</sup> )                                                      | 0.595                                           | 0.595                                                         | 0.595                                                         |
| Refinement                                                                                                     |                                                 |                                                               |                                                               |
| <i>R</i> [ <i>F</i> <sup>2</sup> > 2σ( <i>F</i> <sup>2</sup> )], <i>wR</i> ( <i>F</i> <sup>2</sup> ), <i>S</i> | 0.053, 0.166, 1.09                              | 0.029, 0.073, 1.07                                            | 0.037, 0.104, 1.04                                            |
| No. of reflections                                                                                             | 2084                                            | 2385                                                          | 2668                                                          |
| No. of parameters                                                                                              | 156                                             | 195                                                           | 218                                                           |
| No. of restraints                                                                                              | 0                                               | 14                                                            | 0                                                             |
| $\Delta\rho_{\max}$ , $\Delta\rho_{\min}$ (e Å <sup>-3</sup> )                                                 | 0.42, -0.27                                     | 0.12, -0.13                                                   | 0.14, -0.19                                                   |
| Absolute structure<br>parameter                                                                                | –                                               | 0.08 (5)                                                      | –                                                             |

**Figure S8.** Molecular models of gramine (**1**), and its derivatives **3-13** calculated by the PM5 method (WinMopac 2003)<sup>6</sup>.

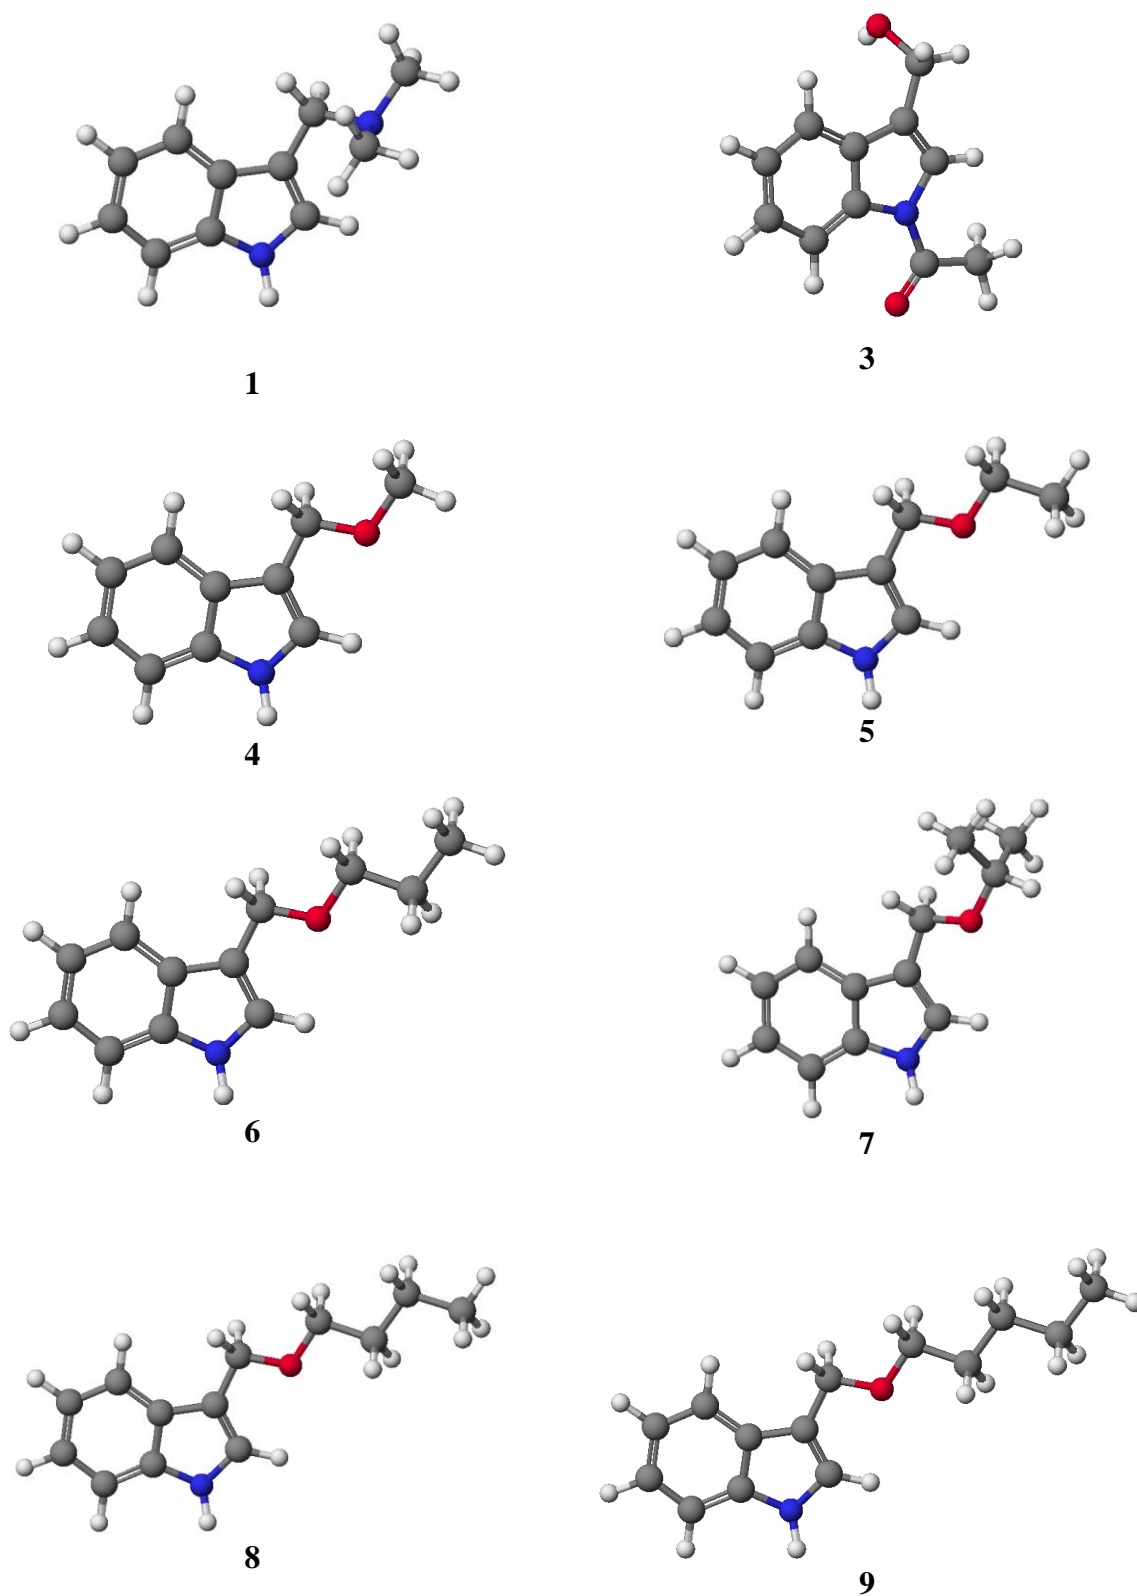

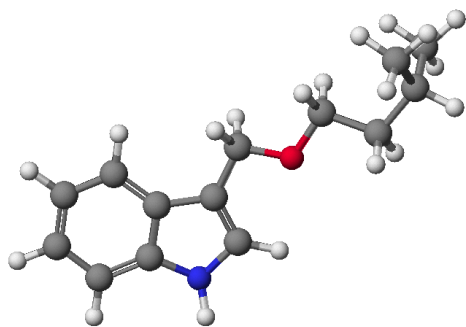

10

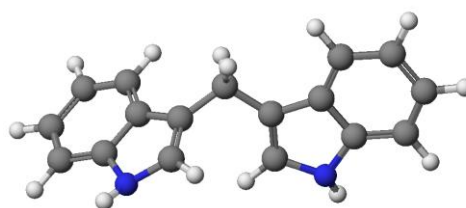

11

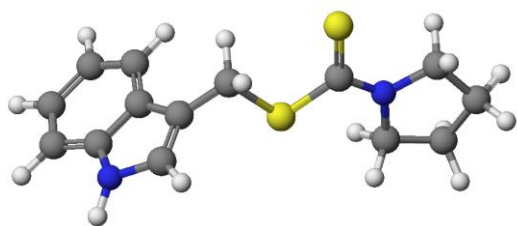

12

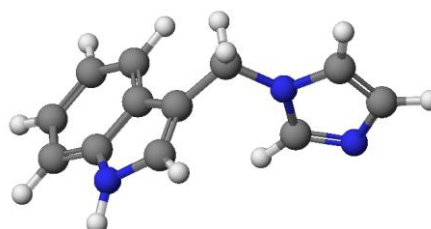

13

**Table S2.** Heat of formation (HOF) [kcal/mol] of gramine (**1**), and its derivatives (**11–15**).

| Number of compound | HOF [kcal/mol] |
|--------------------|----------------|
| <b>1</b>           | 47.9987        |
| <b>2</b>           | -87.7940       |
| <b>3</b>           | -44.3566       |
| <b>4</b>           | 5.3853         |
| <b>5</b>           | -0.5144        |
| <b>6</b>           | -5.9727        |
| <b>7</b>           | -9.8850        |
| <b>8</b>           | -11.4646       |
| <b>9</b>           | -17.0637       |
| <b>10</b>          | -16.6643       |
| <b>11</b>          | 85.2579        |
| <b>12</b>          | 58.4619        |
| <b>13</b>          | 84.3824        |
| <b>14</b>          | -38.3733       |
| <b>15</b>          | -45.2249       |

## References

1. Jump, S. M. et al. N-Alkoxy derivatization of indole-3-carbinol increases the efficacy of the G1 cell cycle arrest and of I3C-specific regulation of cell cycle gene transcription and activity in human breast cancer cells. *Biochemical pharmacology* **75**, 713-724 (2008).
2. Abe, T et al. One-Pot Construction of 3,30-Bisindolylmethanes through Bartoli Indole Synthesis. *Org. Lett.*, **15**, 3622-3625 (2013).
3. Le Borgne, M. et al. Synthesis and *In Vitro* Evaluation of 3-(1-Azolylmethyl)- 1*H*-indoles and 3(1-Azoly1-1-phenylmethyl)-1*H*-indole as Inhibitors of P450 arom. *Arch. Pharm. Pharm. Med. Chem.* **330**, 141-145 (1997),
4. Iwao, M., Motoi, O. Methodology for the efficient synthesis of 3,4-differentially substituted indoles. Fluoride ion-induced elimination-addition reaction of 1-triisopropylsilylgramine methiodides, *Tetrahedron Lett.* **36**, 5929-5932 (1995).
5. Takechi, H., Machida, M., Kanaoka, Y. Intramolecular photoreactions of phthalimide-alkene systems. O Formation of *N*-( $\omega$ -indol-3-ylalkyl)phthalimides. *Chem. Pharm. Bull.* **36**, 2853-2863 (1988).
6. CAChe 5.04 User Guide, Fujitsu Chiba, Japan (2003).
